# Supplementary material for: All-inorganic perovskite CsPbBr3 microstructures growth via chemical vapor deposition for high-performance photodetectors
Source: Royal Society of Chemistry journal article supplement (doi:10.1039/c9nr06682a), 2019-01-01
Supplement: c9nr06682a1.pdf [file c9nr06682a1.pdf]

## Supporting Information

### **All-inorganic Perovskite CsPbBr<sub>3</sub> Microstructures Growth via Chemical Vapor Deposition for High-Performance Photodetectors**

Xindi Mo, Xing Li, Guozhang Dai\*, Pei He, Jia Sun, Han Huang and Junliang Yang\*

*School of Physics and Electronics, Central South University, Changsha 410083,  
Hunan, China*

\* Corresponding author email:

[gzdai2011@csu.edu.cn](mailto:gzdai2011@csu.edu.cn) (G. Z. Dai), +86-731-88660256

[junliang.yang@csu.edu.cn](mailto:junliang.yang@csu.edu.cn) (J. L. Yang), + 86-731-88660256

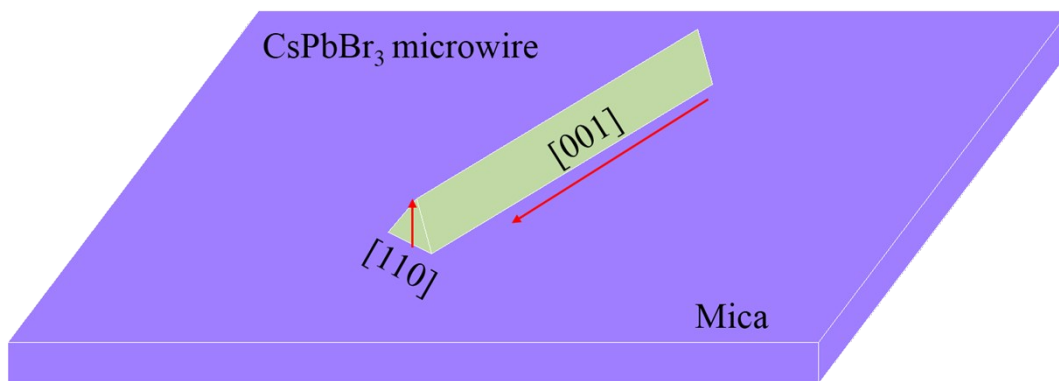

Figure S1. The schematic illustration of growth of CsPbBr<sub>3</sub> microwire on mica.

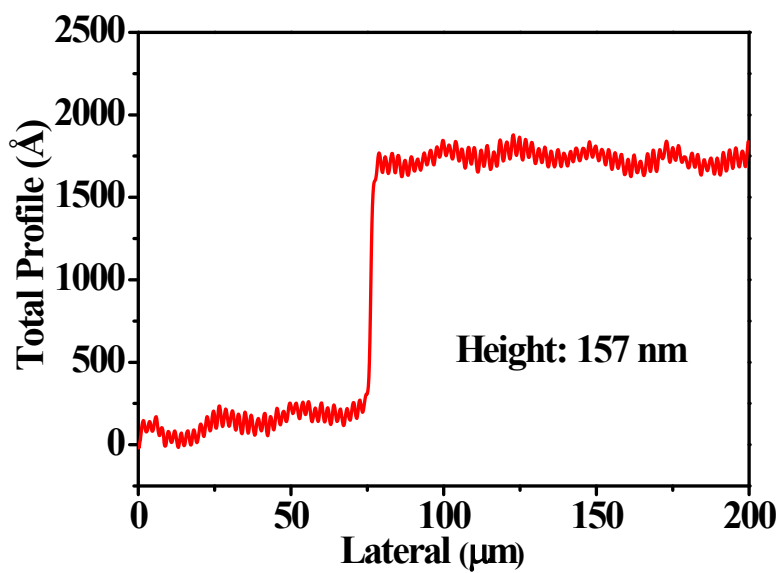

Figure S2. The thickness of typical CsPbBr<sub>3</sub> microplate edge.

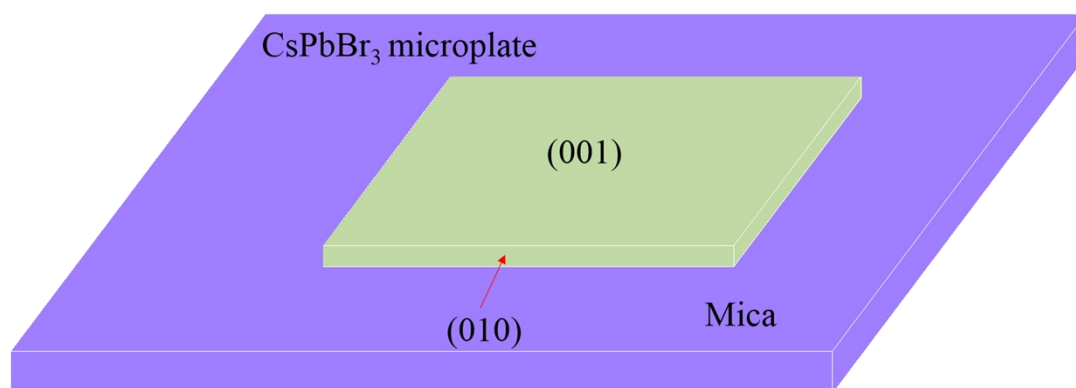

Figure S3. The CsPbBr<sub>3</sub> microplate grown on mica.

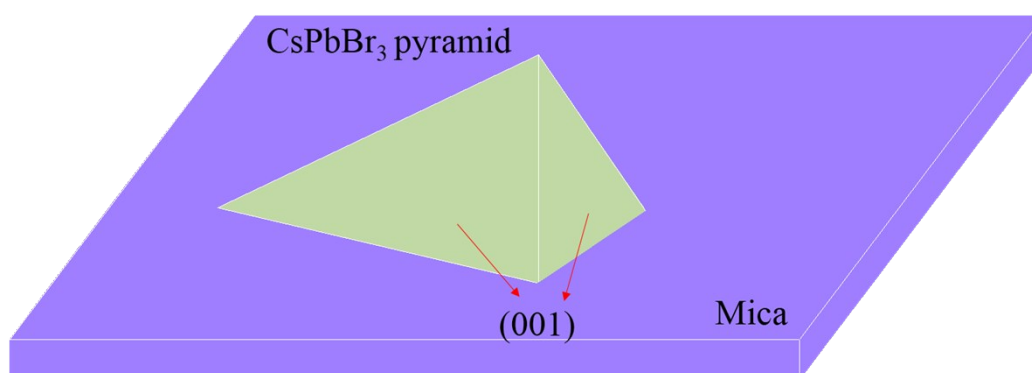

Figure S4. The CsPbBr<sub>3</sub> pyramid grown on mica.

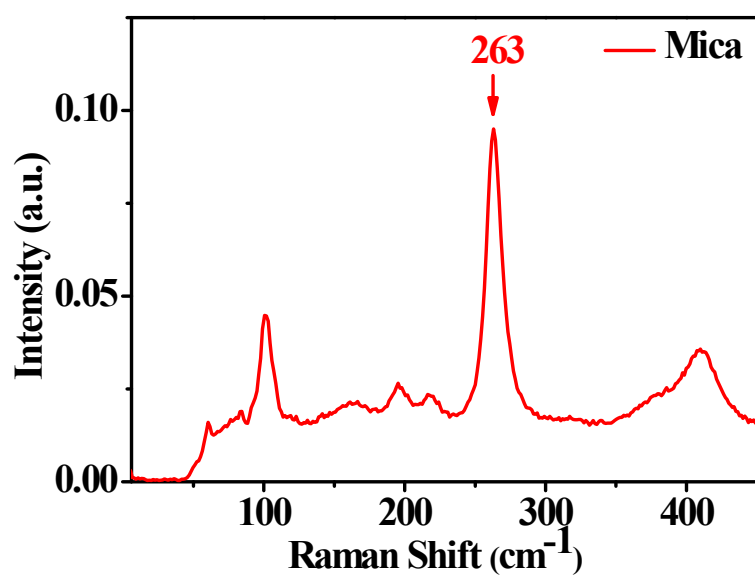

Figure S5. Raman spectra of mica substrate and the peak of 263 cm<sup>-1</sup> was displayed in Figure 2b.

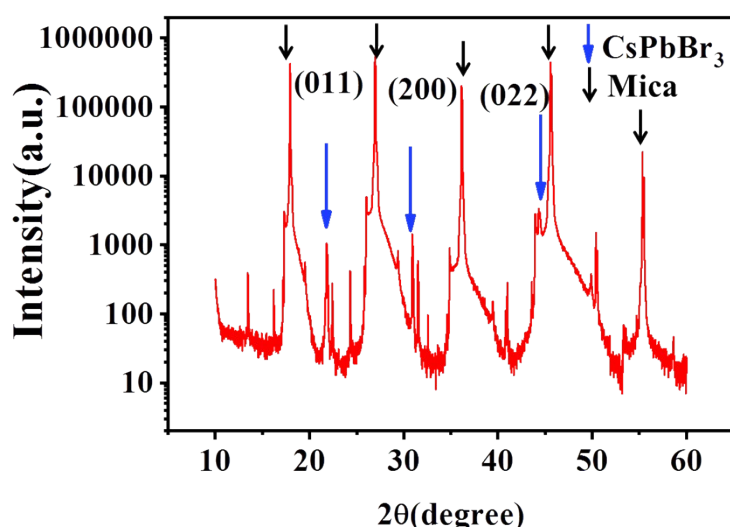

Figure S6.  $\theta$ - $2\theta$  scan of CsPbBr<sub>3</sub> microstructures on mica with log scale. The main contribution from the wire are perovskite (011) and (022) peaks, which was corresponding to cubic (PDF#54-0752).

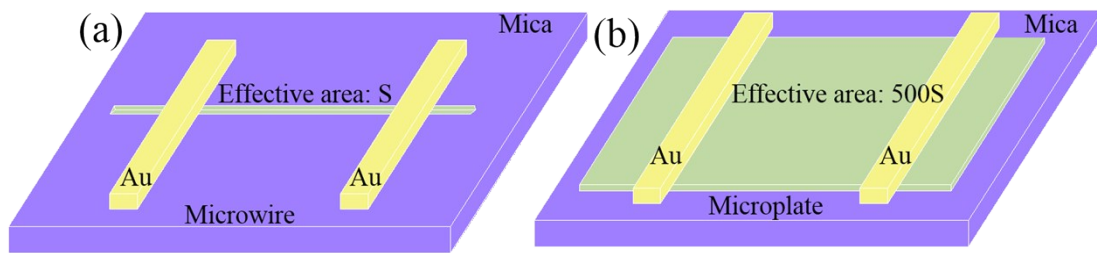

Figure S7. The effective area of devices based on microwire and microplate, respectively.

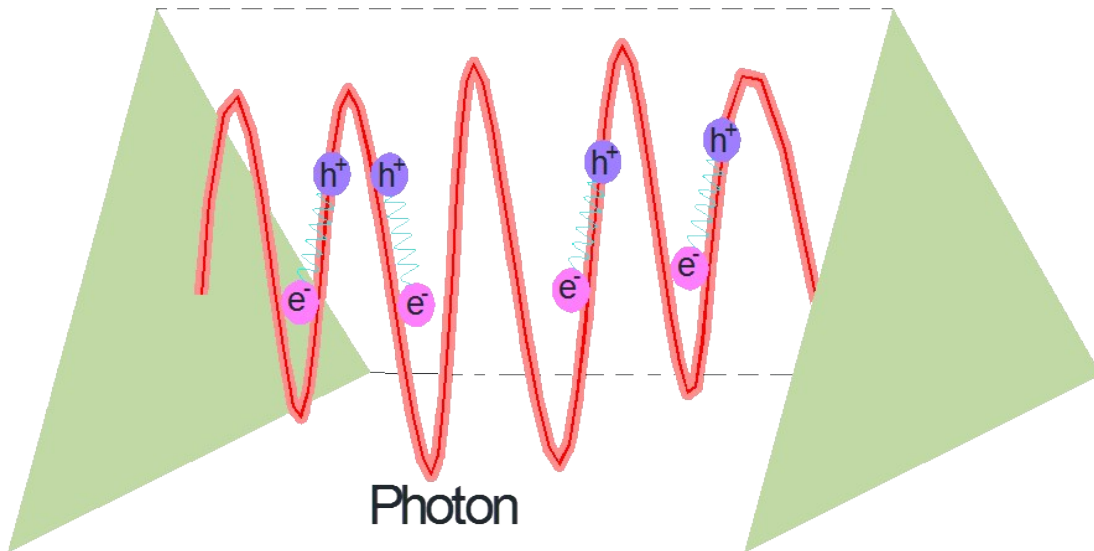

Figure S8. The Fabry-Pérot cavity formed in CsPbBr<sub>3</sub> microwire.
